# Supplementary material for: Laser-reconfigured MoS2/ZnO van der Waals synapse
Source: Royal Society of Chemistry journal article supplement (doi:10.1039/c9nr01748h), 2019-01-01
Supplement: c9nr01748h1.pdf [file c9nr01748h1.pdf]

## SUPPLEMENTARY INFORMATION

### Laser-reconfigured MoS<sub>2</sub>/ZnO Van Der Waals Synapse

*Shu-Hong Shen*<sup>1,2</sup>, *Xue-Feng Wang*<sup>1,2</sup>, *Ye Tian*<sup>1,2</sup>, *Ming-Rui Li*<sup>1,2</sup>, *Yi Yang*<sup>1,2</sup>, and *Tian-Ling Ren*<sup>1,2,\*</sup>

<sup>1</sup>Institute of Microelectronics, Tsinghua University, Beijing 100084, China

<sup>2</sup>Tsinghua Beijing National Research Center for Information Science and Technology (BNRist), Tsinghua University, Beijing 100084, China

\*Corresponding author: Tian-Ling Ren; E-mail: [RenTL@tsinghua.edu.cn](mailto:RenTL@tsinghua.edu.cn)

**Fig. S1**

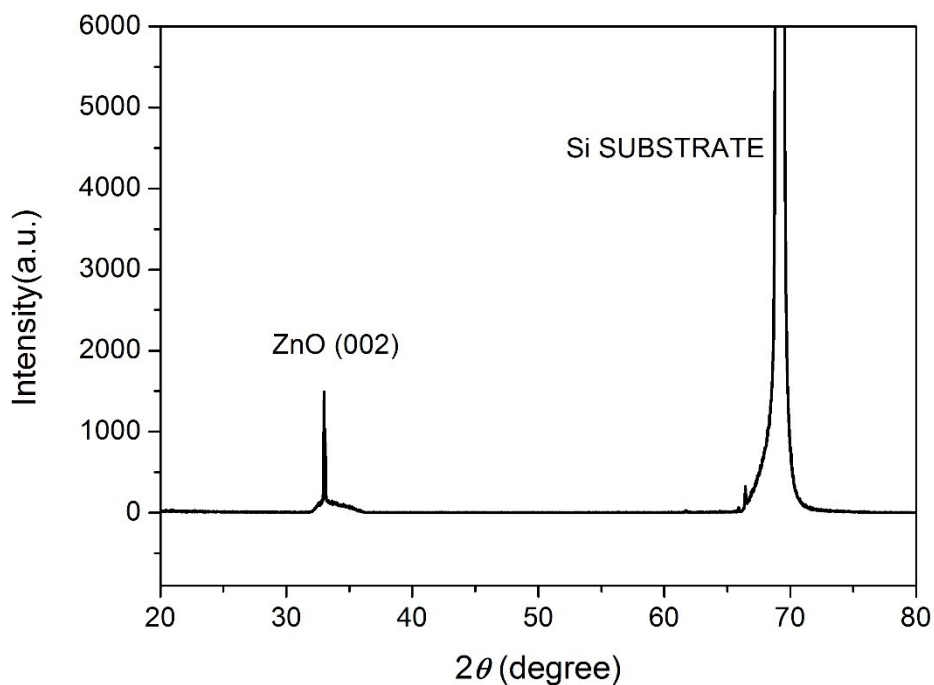

FIG. S1 is a spectrum showing crystal orientations of an X-ray diffraction (XRD) analysis of a ZnO formed using sputtering.

Fig. S2

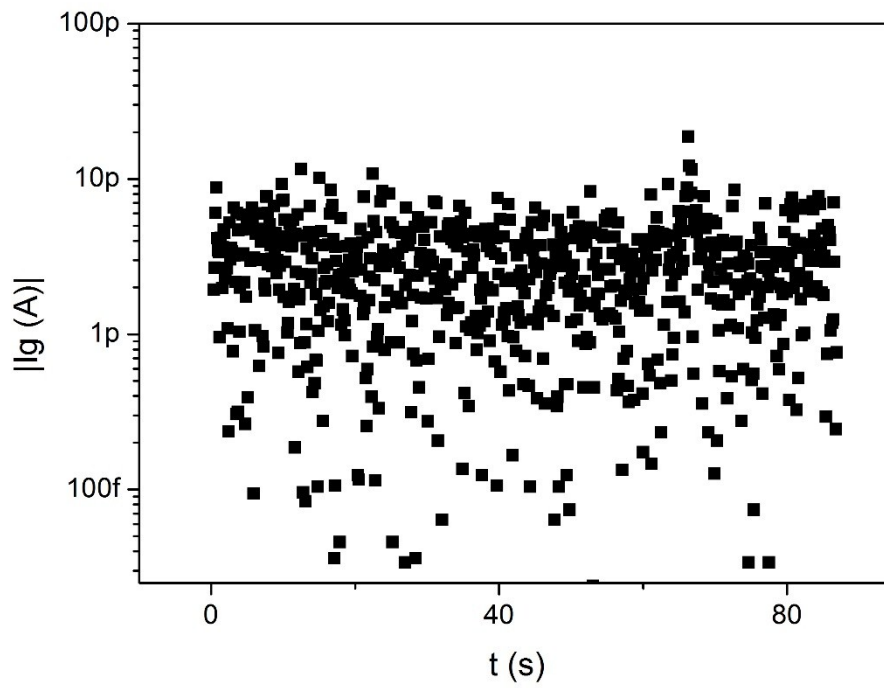

FIG. S2 The leakage current  $I_g$ .

The leakage current of buried gate is lower than  $10^{-12}$  A, approximately.

Fig. S3

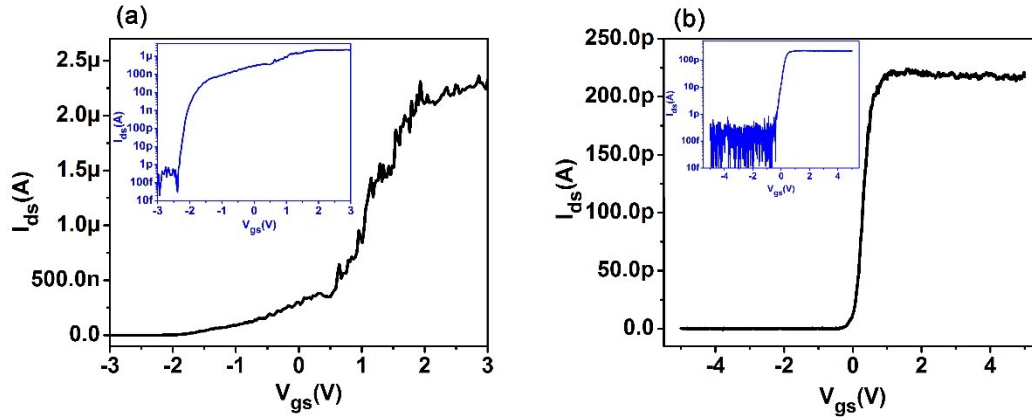

FIG. S3 The transfer curves. (a)the individual MoS<sub>2</sub>. (b) the individual ZnO.

We fabricated and tested the device of individual MoS<sub>2</sub> and ZnO. The electrical characterizations are shown in Supplementary Figure 3a and 3b. The on/off ratio are  $10^6$  and  $10^3$ , respectively. The threshold voltage are -1 V and 0 V, respectively.

Fig. S4

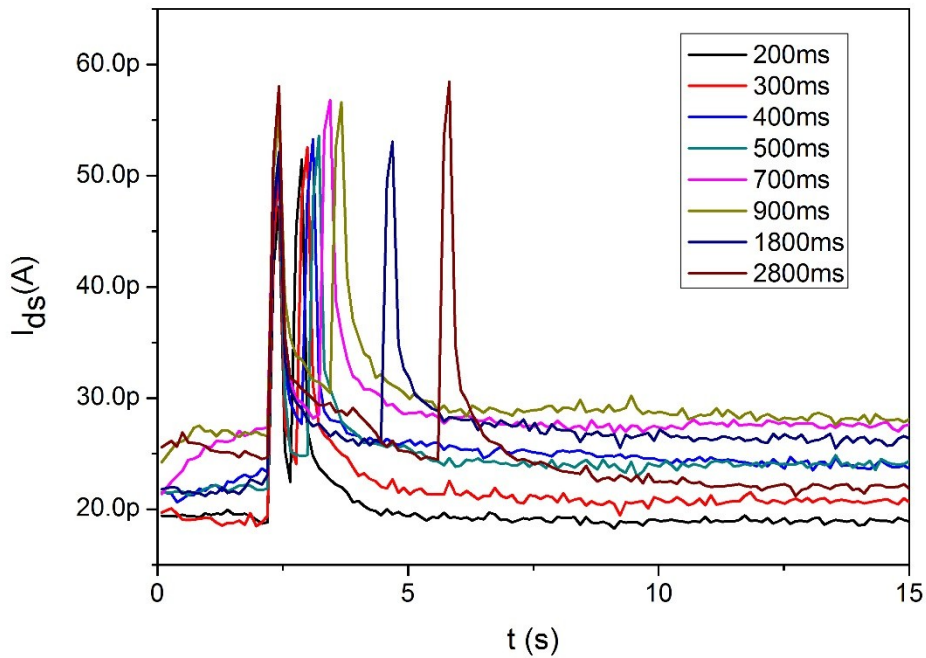

Fig. S4 The  $I_{ds}$  triggered by a pair of presynaptic pulses with different interval time ( $\Delta t$ ).

A spike of postsynaptic current was generated by a presynaptic spike (3 V, 200 ms). If two presynaptic spikes are close enough, the  $I_{ds}$  generated by the second presynaptic spike will be enhanced, which can be used to mimic paired-pulse facilitation (PPF) in the neuroscience. As shown in Fig. S4, the amplitude of the  $I_{ds}$  peak value generated by the second presynaptic pulse is larger than that of the first one. And the longer the interval time between two presynaptic spikes is, the lower ratio will be.

**Fig. S5**

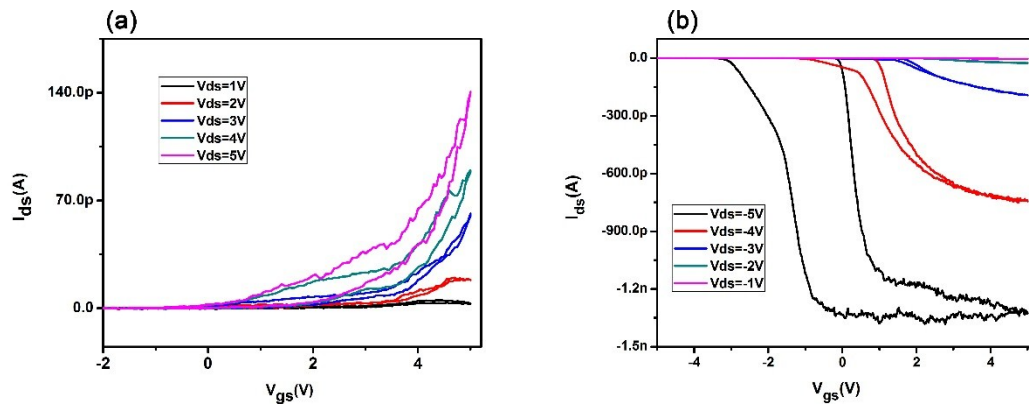

Fig. S5 The transfer characteristics of the transistors. (a)  $V_{ds} = 5$  V (b)  $V_{ds} = -5$  V.

The transfer characteristics of the transistors with different drain voltages were shown in the Supplementary Figure 5. As is shown in the picture, the  $I_{ds}$  and hysteresis loop increases with the increase of voltage amplitude.

Fig. S6

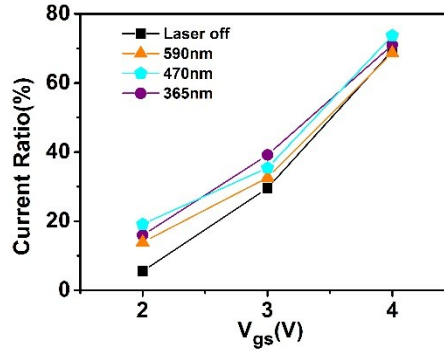

Fig. S6 The PSC current ratio under different illumination conditions. Current ratio =  $((I - I_0)/I_0) \times 100\%$ .  $I$  is the initial drain current after the gate voltage pulse stimulation.  $I_0$  is the base current before the pulse.

Table S1. When  $\Delta t = 200$  ms, the PPF ratio of MoS<sub>2</sub>/ZnO Van Der Waals synapse and other two-terminal artificial synapse.

|                                                           | Ratio ( $\Delta t = 200$ ms) |
|-----------------------------------------------------------|------------------------------|
| MoS <sub>2</sub> /ZnO synapse                             | 15%                          |
| organic thin film memristors (Ref.36)                     | 6%                           |
| tungsten-oxide (WO <sub>x</sub> ) memristor (Ref.37)      | <1%                          |
| Ta/TaO <sub>x</sub> /TiO <sub>2</sub> /Ti device (Ref.38) | 4%                           |

According to the comparison, the PPF ratio of MoS<sub>2</sub>/ZnO synapse is larger than two-terminal artificial synapse. Compared with other devices, we can get more obvious PPF at the same time interval.

- S1. Y.-N. Zhong, T. Wang, X. Gao, J.-L. Xu and S.-D. Wang, *Advanced Functional Materials*, 2018, **28**, 1800854.
- S2. T. Chang, P. Sheridan and W. Lu, 2012.
- S3. Y.-F. Wang, Y.-C. Lin, I. T. Wang, T.-P. Lin and T.-H. Hou, *Scientific Reports*, 2015, **5**, 10150.
